# Supplementary material for: Accumulation of ether phospholipids in induced pluripotent stem cells and oligodendrocyte‐lineage cells established from patients with Sjögren‐Larsson syndrome
Source: PubMed Central journal article supplement (PMC11608845; doi:10.1111/cga.12587), 2024-12-01
Supplement: CGA-65-0-s001.pdf [file CGA-65-0-s001.pdf]

# Supplementary Figure 1. Characterization of SLS patient-derived iPSCs.

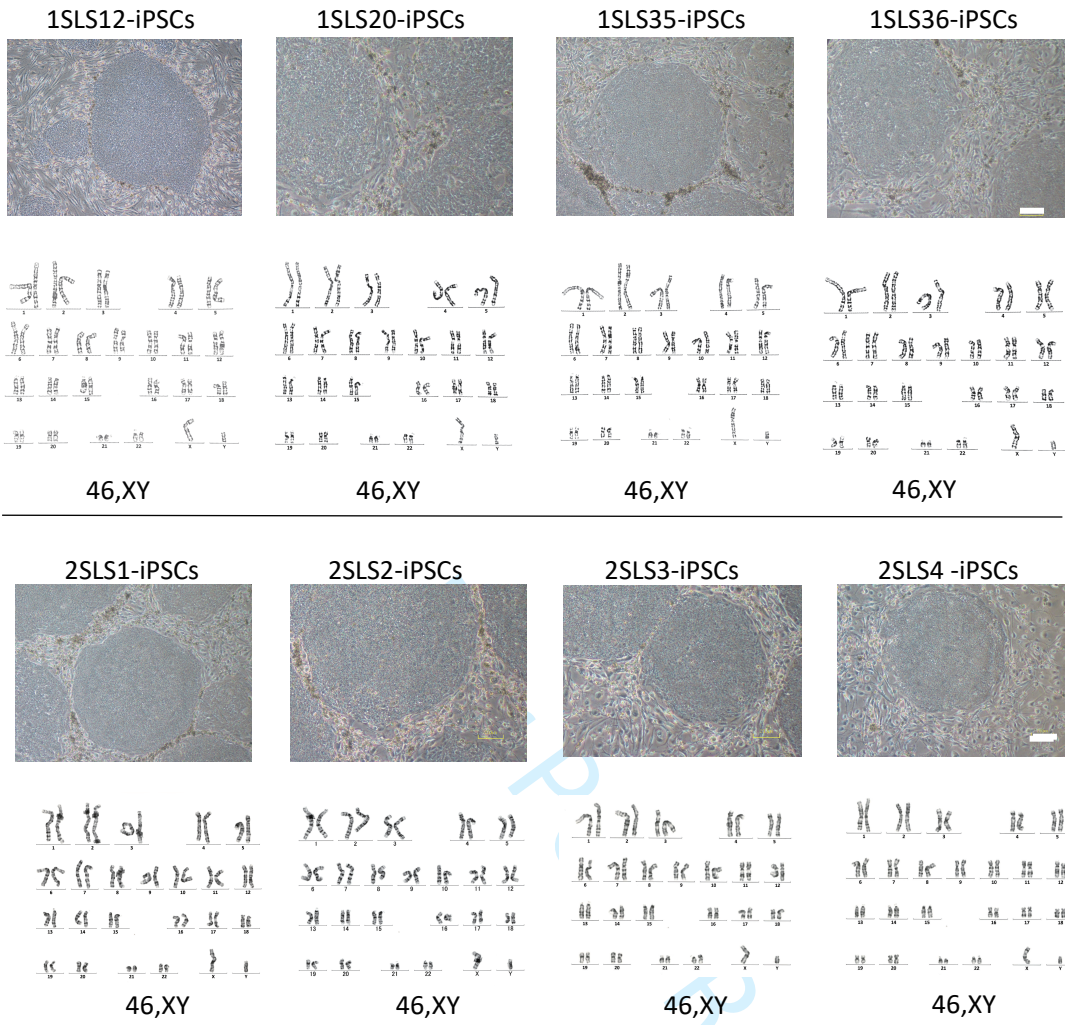

Preview
